# Supplementary material
Source: HighWire-hosted journal article supplement (https://ard.bmj.com/content/ard-2024-225914)
Supplement: inline-supplementary-material-1 [file inline-supplementary-material-1.pdf]

# Interview Form on Rheumatoid Arthritis

Patient ID  Name

Date recorded

## Tender joints

Please mark an X on the joints that hurt when pressed.

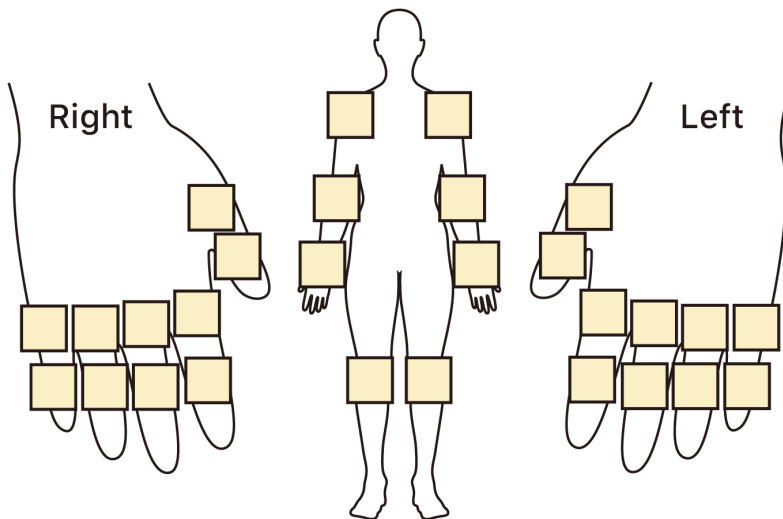

**Example**

## Swollen joints

Please mark an X on the joints that are enlarged.

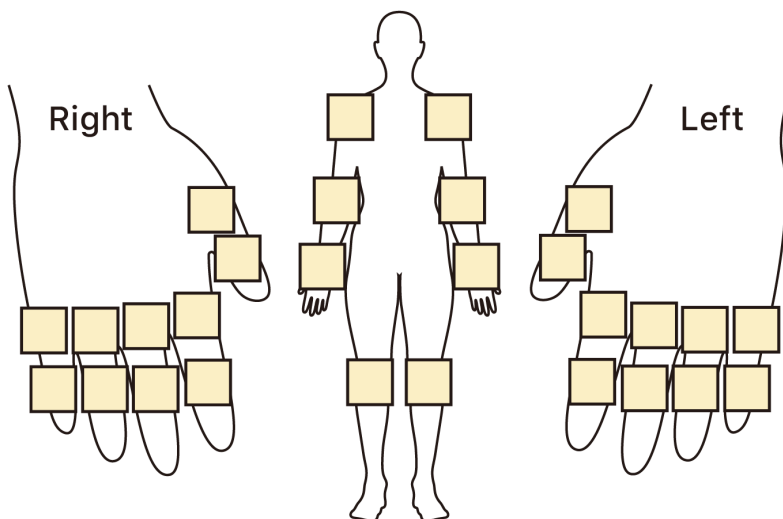

## General health

Please evaluate your general health status.

Best possible Worst possible

**Example** Please mark a vertical line that crosses over the horizontal scale.

[Reference] *Annals of the Rheumatic Diseases*, 1990;49:916-920. *Arthritis & Rheumatism*, 1995;38:44-48.
